# Supplementary material for: Survey dataset of women perception on caesarean section
Source: PubMed Central journal article supplement — Data Brief. 2021 Feb 6;35:106501. doi: 10.1016/j.dib.2020.106501 (PMC8100895; doi:10.1016/j.dib.2020.106501), 2021-02-06
Supplement: mmc1.pdf [file mmc1.pdf]

*This questionnaire consists of **SECTION A**, **SECTION B** and **SECTION C**. Please answer all of the following questions.*

**SECTION A: Demographic Background**

**Age:**     Below 20     20-30     31-40     Above 40

**Number of Children:**     None     Single child     Multiple

**Experience of caesarean section:**     Yes     No

**First degree relative (parents + siblings) experience of caesarean section:**

Yes     No

**SECTION B:**

*How did you obtain the information about the birth delivery mode that helped you to decide on your preference? (you can tick more than one boxes that apply)*

- |                                                  |                                                              |
|--------------------------------------------------|--------------------------------------------------------------|
| <input type="checkbox"/> Obstetrician or midwife | <input type="checkbox"/> Internet                            |
| <input type="checkbox"/> Husband or partner      | <input type="checkbox"/> Television                          |
| <input type="checkbox"/> Parents or relatives    | <input type="checkbox"/> Social media                        |
| <input type="checkbox"/> Friends                 | <input type="checkbox"/> Newspapers/magazines/books/journals |
| <input type="checkbox"/> Through a course        | <input type="checkbox"/> Others                              |

**SECTION C:**

*For section C, answer the question then select the number 1-5 according to your perceptions for the following questions. Number 1 means you strongly disagree, 2 disagree, 3 neutral, 4 agree and 5 strongly agree with the statement.*

| <b>What do you think about caesarean section (CS)?</b>                                                 | <b>Strongly Disagree</b> | <b>Disagree</b> | <b>Neutral</b> | <b>Agree</b> | <b>Strongly Agree</b> |
|--------------------------------------------------------------------------------------------------------|--------------------------|-----------------|----------------|--------------|-----------------------|
| 1. Is performed to train younger practitioners                                                         | 1                        | 2               | 3              | 4            | 5                     |
| 2. Will result in longer hospital stay                                                                 | 1                        | 2               | 3              | 4            | 5                     |
| 3. Is tempted by hospital incomes and profit                                                           | 1                        | 2               | 3              | 4            | 5                     |
| 4. Is worthwhile even if there are economic burdens                                                    | 1                        | 2               | 3              | 4            | 5                     |
| 5. Is worthwhile if it helps the intimate relationship                                                 | 1                        | 2               | 3              | 4            | 5                     |
| 6. Degree of intimacy with baby may be low                                                             | 1                        | 2               | 3              | 4            | 5                     |
| 7. Sense of accomplishment about childbirth is less                                                    | 1                        | 2               | 3              | 4            | 5                     |
| 8. Because many people do it, it seems to be fine                                                      | 1                        | 2               | 3              | 4            | 5                     |
| 9. Even if a pregnant woman wants it, it should not be done if there is no absolute medical indication | 1                        | 2               | 3              | 4            | 5                     |
| 10. Is not good because it will give negative effect to my future pregnancy and childbirth             | 1                        | 2               | 3              | 4            | 5                     |
| 11. Can do to adjust date of birth                                                                     | 1                        | 2               | 3              | 4            | 5                     |
| 12. Requires more time to recover                                                                      | 1                        | 2               | 3              | 4            | 5                     |
| 13. Is safer for the mother                                                                            | 1                        | 2               | 3              | 4            | 5                     |
| 14. Is selected based on the doctor's preference who seeks stability                                   | 1                        | 2               | 3              | 4            | 5                     |
| 15. Can select according to personal preference                                                        | 1                        | 2               | 3              | 4            | 5                     |
| 16. Is not as good as it is an artificial method                                                       | 1                        | 2               | 3              | 4            | 5                     |
| 17. Pain is less than that of natural childbirth                                                       | 1                        | 2               | 3              | 4            | 5                     |
| 18. My baby will suffer less                                                                           | 1                        | 2               | 3              | 4            | 5                     |

*Thank you for answering this questionnaire*
